# Supplementary material
Source: publisher site journal article supplement (https://www.dovepress.com/article/388082)
Supplement: Supplementary file 1 [file get_supplementary_file.php]

**Supplementary File**

**Table S1.** Exploratory examination of simple effects of time x group interaction on pain intensity (N = 224)

|  | Mdiff [95% CI] | S.E.diff |  | Cohen's d [95% CI] |
| --- | --- | --- | --- | --- |
| Simple effects of group within timepoint | | | | |
| Pre-test (T1) |  |  |  |  |
| MM - CP | 0.129 [-1.136, 1.395] | 0.475 |  | -0.049 [-0.414, 0.316] |
| HYP - CP | 0.089 [-1.169, 1.347] | 0.472 |  | -0.058 [-0.417, 0.302] |
| HYP - MM | -0.041 [-1.338, 1.257] | 0.487 |  | -0.009 [-0.381, 0.363] |
| CN - CP | 0.101 [-1.162, 1.364] | 0.474 |  | -0.039 [-0.410, 0.331] |
| CN - MM | -0.029 [-1.331, 1.274] | 0.489 |  | 0.010 [-0.373, 0.393] |
| CN - HYP | 0.012 [-1.283, 1.307] | 0.487 |  | 0.019 [-0.359, 0.397] |
| Post-test (T2) |  |  |  |  |
| MM - CP | -0.331 [-1.555, 0.893] | 0.460 |  | -0.147 [-0.512, 0.219] |
| HYP - CP | -1.005 [-2.222, 0.212] | 0.457 |  | -0.445 [-0.808, -0.080] |
| HYP - MM | -0.674 [-1.929, 0.581] | 0.471 |  | -0.289 [-0.663, 0.085] |
| CN - CP | -0.100 [-1.322, 1.122] | 0.459 |  | -0.045 [-0.416, 0.325] |
| CN - MM | 0.231 [-1.029, 1.491] | 0.473 |  | 0.105 [-0.278, 0.488] |
| CN - HYP | 0.905 [-0.348, 2.158] | 0.471 |  | 0.409 [0.026, 0.790] |
| Simple effects of time within group | | | | |
| CP (T2 - T1) | -0.255 [-0.926, 0.416] | 0.340 |  | -0.160 [-0.410, 0.091] |
| MM (T2 - T1) | -0.715 [-1.430, -0.001] | 0.363 |  | -0.223 [-0.492, 0.048] |
| HYP (T2 - T1) | -1.349 [-2.056, -0.642] | 0.359 |  | -0.488 [-0.761, -0.212] |
| CN (T2 - T1) | -0.456 [-1.168, 0.257] | 0.361 |  | -0.140 [-0.416, 0.136] |
| Note. Pairwise comparisons used estimated marginal means. | | | | |

**Table S2.** Exploratory examination of simple effects of time x group interaction on pain tolerance (N = 224)

|  | Mdiff [95% CI] | S.E.diff |  | Cohen's d [95% CI] |
| --- | --- | --- | --- | --- |
| Simple effects of group within timepoint | | | | |
| Pre-test (T1) |  |  |  |  |
| MM - CP | -6.653 [-68.006, 54.699] | 23.041 |  | -0.095 [-0.460, 0.270] |
| HYP - CP | -8.874 [-69.872, 52.124] | 22.908 |  | -0.011 [-0.371, 0.348] |
| HYP - MM | -2.221 [-65.134, 60.693] | 23.627 |  | 0.084 [-0.288, 0.457] |
| CN - CP | -30.324 [-91.571, 30.922] | 23.001 |  | -0.238 [-0.609, 0.134] |
| CN - MM | -23.671 [-86.825, 39.483] | 23.717 |  | -0.143 [-0.526, 0.241] |
| CN - HYP | -21.450 [-84.260, 41.359] | 23.588 |  | -0.227 [-0.606, 0.152] |
| Post-test (T2) |  |  |  |  |
| MM - CP | 16.693 [-37.487, 70.873] | 20.347 |  | 0.091 [-0.274, 0.456] |
| HYP - CP | 32.568 [-21.299, 86.435] | 20.230 |  | 0.359 [-0.005, 0.720] |
| HYP - MM | 15.875 [-39.683, 71.433] | 20.865 |  | 0.270 [-0.104, 0.643] |
| CN - CP | -27.195 [-81.280, 26.891] | 20.312 |  | -0.279 [-0.651, 0.094] |
| CN - MM | -43.887 [-99.657, 11.883] | 20.944 |  | -0.372 [-0.757, 0.015] |
| CN - HYP | -59.762 [-115.228, -4.297] | 20.830 |  | -0.656 [-1.043, -0.267] |
| Simple effects of time within group | | | | |
| CP (T2 - T1) | 9.503 [-15.520, 34.525] | 12.695 |  | 0.182 [-0.069, 0.433] |
| MM (T2 - T1) | 32.849 [6.196, 59.502] | 13.523 |  | 0.342 [0.066, 0.615] |
| HYP (T2 - T1) | 50.944 [24.582, 77.307] | 13.375 |  | 0.595 [0.311, 0.874] |
| CN (T2 - T1) | 12.632 [-13.934, 39.198] | 13.478 |  | 0.163 [-0.114, 0.439] |
| Note. Pairwise comparisons used estimated marginal means. | | | | |

**Table S3.** Sensitivity analysis addressing multicollinearity in the doubly multivariate mixed-design ANOVA of secondary outcomes (N = 221)

|  | Wilks' λ | F | dfbetween | dfwithin | p | ηp2 |
| --- | --- | --- | --- | --- | --- | --- |
| Repeated-Measures Tests | |  |  |  |  |  |
| Time X Group X Gender | 0.886 | 1.061 | 24 | 598.064 | .385 | .040 |
| Time X Group | 0.831 | 1.646 | 24 | 598.064 | .028 | .060 |
| Time X Gender | 0.920 | 2.244 | 8 | 206 | .026 | .080 |
| Time | 0.537 | 22.246 | 8 | 206 | <. 001 | .463 |
| Between-Subjects Tests | |  |  |  |  |  |
| Group X Gender | 0.928 | 1.322 | 12 | 555.899 | .202 | .025 |
| Group | 0.939 | 1.108 | 12 | 555.899 | .350 | .021 |
| Gender | 0.814 | 12.017 | 4 | 210 | <. 001 | .186 |
| Note. The dependent variable is the multivariate combination of RMSSD, SDNN, pNN50, and LF/HF-FFT. For the current sensitivity analysis, HF-FFT, HF-AR, and LF/HF were excluded due to Pearson correlations of r > .90 with other outcome variables. | | | | | | |

**Table S4.** Univariate follow-up tests for significant results of sensitivity analysis of multivariate tests of secondary outcomes controlling for multicollinearity (N = 221)

| Dependent variable | F | dfbetweena | dfwithina | p | ηp2 |
| --- | --- | --- | --- | --- | --- |
| Predictor variable: Time X Groupa | | | | | |
| RMSSD | 1.492 | 5.919 | 420.262 | .180 | .021 |
| SDNN | 0.844 | 5.914 | 419.894 | .535 | .012 |
| pNN50 | 0.740 | 5.351 | 379.893 | .602 | .010 |
| LF/HF-FFT | 2.236 | 5.392 | 382.811 | .046 | .031 |
| aRepeated-measures tests used Greenhouse-Geisser adjustment for degrees of freedom. | | | | | |

**Table S5.** Tests of polynomial contrasts of the time x group interaction on secondary outcomes (follow-up to multicollinearity sensitivity analysis; N = 221)

| Dependent variable | Type of effect | F(3, 213) | p | ηp2 |
| --- | --- | --- | --- | --- |
| RMSSD | Linear | 2.164 | .093 | .030 |
|  | Quadratic | 0.780 | .605 | .011 |
| SDNN | Linear | 0.804 | .493 | .011 |
|  | Quadratic | 0.895 | .444 | .012 |
| pNN50 | Linear | 0.684 | .563 | .010 |
|  | Quadratic | 0.856 | .465 | .012 |
| LF/HF-FFT | Linear | 1.547 | .203 | .021 |
|  | Quadratic | 2.602 | .053 | .035 |

**Table S6.** Pairwise comparisons of the simple effects of time x group on LF/HF-FFT (follow-up to multicollinearity sensitivity analysis; N = 221)

|  | Mdiff [95% CI] | S.E.diff | pa | Cohen's d [95% CI] |
| --- | --- | --- | --- | --- |
| Simple effects of group within timepoint | | | | |
| T0 |  |  |  |  |
| MM - CP | 0.376 [-1.051, 1.804] | 0.536 | 1.000 | 0.230 [-0.136, 0.596] |
| HYP - CP | 1.325 [-0.094, 2.744] | 0.533 | .082 | 0.412 [0.047, 0.774] |
| HYP - MM | 0.948 [-0.513, 2.410] | 0.549 | .512 | 0.219 [-0.155, 0.591] |
| CN - CP | 0.964 [-0.468, 2.397] | 0.538 | .447 | 0.330 [-0.043, 0.703] |
| CN - MM | 0.588 [-0.886, 2.062] | 0.554 | 1,000 | 0.132 [-0.251, 0.515] |
| CN - HYP | -0.360 [-1.827, 1.106] | 0.551 | 1,000 | -0.082 [-0.459, 0.296] |
| T1 |  |  |  |  |
| MM - CP | -1.063 [-3.269, 1.142] | 0.828 | 1.000 | -0.166 [-0.532, 0.201] |
| HYP - CP | 1.345 [-0.848, 3.538] | 0.823 | .623 | 0.231 [-0.132, 0.593] |
| HYP - MM | 2.408 [0.150, 4.666] | 0.848 | .030 | 0.420 [0.042, 0.790] |
| CN - CP | -0.295 [-2.509, 1.919] | 0.831 | 1.000 | -0.005 [-0.381, 0.371] |
| CN - MM | 0.768 [-1.510, 3.047] | 0.856 | 1.000 | 0.220 [-0.169, 0.607] |
| CN - HYP | -1.640 [-3.906, 0.626] | 0.851 | .332 | -0.257 [-0.640, 0.127] |
| T2 |  |  |  |  |
| MM - CP | -0.370 [-1.975, 1.234] | 0.603 | 1.000 | -0.050 [-0.415, 0.315] |
| HYP - CP | 0.060 [-1.535, 1.655] | 0.599 | 1.000 | 0.093 [-0.267, 0.453] |
| HYP - MM | 0.430 [-1.213, 2.073] | 0.617 | 1.000 | 0.204 [-0.170, 0.576] |
| CN - CP | 0.518 [-1.092, 2.129] | 0.605 | 1.000 | 0.124 [-0.247, 0.495] |
| CN - MM | 0.888 [-0.769, 2.546] | 0.622 | .929 | 0.214 [-0.170, 0.597] |
| CN - HYP | 0.458 [-1.190, 2.107] | 0.619 | 1.000 | 0.050 [-0.327, 0.425] |
| Simple effects of time within group | | | | |
| CP |  |  |  |  |
| T1 - T0 | 0.600 [-0.757, 1.958] | 0.563 | .862 | 0.062 [-0.189, 0.313] |
| T2 - T0 | -0.025 [-1.027, 0.978] | 0.415 | 1.000 | -0.093 [-0.342, 0.157] |
| T2 - T1 | -0.625 [-1.848, 0.598] | 0.507 | .657 | -0.215 [-0.468, 0.040] |
| MM |  |  |  |  |
| T1 - T0 | -0.839 [-2.280, 0.602] | 0.597 | .484 | -0.311 [-0.582, -0.036] |
| T2 - T0 | -0.771 [-1.835, 0.293] | 0.441 | .245 | -0.407 [-0.683, -0.128] |
| T2 - T1 | 0.068 [-1.230, 1.367] | 0.538 | 1.000 | -0.080 [-0.347, 0.188] |
| HYP |  |  |  |  |
| T1 - T0 | 0.621 [-0.805, 2.046] | 0.591 | .884 | 0.077 [-0.183, 0.337] |
| T2 - T0 | -1.289 [-2.342, -0.237] | 0.436 | .010 | -0.435 [-0.705, -0.162] |
| T2 - T1 | -1.910 [-3.194, -0.626] | 0.532 | .001 | -0.278, [-0.542, -0.013] |
| CN |  |  |  |  |
| T1 - T0 | -0.659 [-2.110, 0.792] | 0.601 | .824 | -0.172 [-0.453, 0.111] |
| T2 - T0 | -0.471 [-1.542, 0.601] | 0.444 | .872 | -0.209 [-0.485, 0.070] |
| T2 - T1 | 0.188 [-1.119, 1.496] | 0.542 | 1.000 | -0.019 [-0.299, 0.261] |
| Note. Pairwise comparisons used estimated marginal means. | | |  |  |
| aBonferroni-adjusted for multiple comparisons. | |  |  |  |

**Table S7.** Winsorized means (standard deviations) of secondary outcome variables (heart-rate variability measures)

|  | Total sample  (N = 224) | CP  (n = 62) | MM  (n = 54) | HYP  (n = 57) | CN  (n = 51) |
| --- | --- | --- | --- | --- | --- |
| RMSSD |  |  |  |  |  |
| Baseline (T0; 4 cases Winsorized) | 31.19 (20.65) | 30.73 (20.63) | 35.50 (22.38) | 26.98 (16.64) | 31.90 (22.38) |
| Pre-Test (T1; n = 221; 5 cases Winsorized) | 44.82 (25.06) | 45.89 (27.80) | 47.76 (27.07) | 43.21 (22.76) | 42.13 (21.83) |
| Post-Test (T2; 2 cases Winsorized) | 50.62 (26.21) | 53.95 (30.52) | 52.31 (23.46) | 45.98 (24.72) | 49.95 (24.84) |
| SDNN STD RR ms |  |  |  |  |  |
| Baseline (T0; 3 cases Winsorized) | 37.48 (18.57) | 35.82 (18.55) | 41.45 (18.61) | 34.21 (16.76) | 38.96 (20.07) |
| Pre-Test (T1; n = 221; 4 cases Winsorized) | 49.14 (22.58) | 48.99 (24.81) | 53.32 (24.37) | 47.64 (20.13) | 46.45 (20.22) |
| Post-Test (T2; 3 cases Winsorized) | 53.21 (21.94) | 52.57 (23.43) | 55.95 (21.25) | 51.39 (22.61) | 53.10 (20.33) |
| pNN50 |  |  |  |  |  |
| Baseline (T0; 4 cases Winsorized) | 9.73 (12.18) | 9.57 (12.55) | 12.08 (13.19) | 7.68 (10.75) | 9.75 (12.01) |
| Pre-Test (T1; n = 221; 2 cases Winsorized) | 19.06 (15.84) | 18.47 (14.87) | 21.87 (17.27) | 18.81 (16.43) | 16.98 (14.71) |
| Post-Test (T2; no cases Winsorized) | 24.29 (18.36) | 25.25 (19.85) | 26.98 (17.17) | 21.54 (17.90) | 23.33 (18.25) |
| HF FFT ms2 |  |  |  |  |  |
| Baseline (T0; 2 cases Winsorized) | 502.59 (597.88) | 476.43 (519.48) | 646.37 (697.28) | 369.04 (481.44) | 531.40 (667.62) |
| Pre-Test (T1; n = 221; 3 cases Winsorized) | 967.52 (1250.16) | 1014.64 (1372.10) | 1195.69 (1491.46) | 868.00 (1145.09) | 773.17 (843.97) |
| Post-Test (T2; 7 cases Winsorized) | 1284.29 (1312.06) | 1239.61 (1273.08) | 1517.31 (1393.72) | 1121.69 (1229.93) | 1273.61 (1362.34) |
| HF AR ms2 |  |  |  |  |  |
| Baseline (T0; 4 cases Winsorized) | 524.94 (576.59) | 507.14 (552.61) | 644.08 (657.34) | 419.41 (470.39) | 538.37 (612.97) |
| Pre-Test (T1; n = 221; 3 cases Winsorized) | 1022.41 (1177.19) | 1021.37 (1283.10) | 1266.06 (1343.85) | 962.70 (1070.35) | 824.65 (923.01) |
| Post-Test (T2; 1 case Winsorized) | 1439.14 (1641.35) | 1492.59 (1752.20) | 1594.13 (1639.60) | 1162.07 (1197.97) | 1519.71 (1920.73) |
| LF/HF FFT ms2 |  |  |  |  |  |
| Baseline (T0; 2 cases Winsorized) | 2.80 (2.19) | 2.32 (1.70) | 2.78 (2.27) | 3.20 (2.32) | 2.97 (2.44) |
| Pre-Test (T1; n = 221; 6 cases Winsorized) | 2.57 (3.26) | 2.32 (3.21) | 2.01 (1.89) | 3.36 (4.22) | 2.56 (3.13) |
| Post-Test (T2; 3 cases Winsorized) | 2.01 (2.26) | 1.70 (1.80) | 1.84 (1.87) | 2.31 (2.59) | 2.24 (2.72) |
| LF/HF AR ms2 |  |  |  |  |  |
| Baseline (T0; 3 cases Winsorized) | 2.65 (2.03) | 2.23 (1.64) | 2.66 (2.10) | 3.03 (2.27) | 2.74 (2.08) |
| Pre-Test (T1; n = 221; 2 cases Winsorized) | 2.71 (3.78) | 2.64 (4.65) | 2.04 (1.78) | 3.35 (4.09) | 2.77 (3.79) |
| Post-Test (T2; 4 cases Winsorized) | 1.93 (2.03) | 1.53 (1.51) | 1.78 (1.64) | 2.40 (2.48) | 2.05 (2.31) |

Note. All cases with z-scores ≥ 3 were Winsorized by replacing their raw scores with the next most extreme raw score with a z-score < 3.

**Table S8.** Sensitivity analysis addressing HRV outliers in the doubly multivariate mixed-design ANOVA of secondary outcomes (N = 221)

|  | Wilks' λ | F | dfbetween | dfwithin | p | ηp2 |
| --- | --- | --- | --- | --- | --- | --- |
| Repeated-Measures Tests | |  |  |  |  |  |
| Time X Group X Gender | 0.833 | 0.896 | 42 | 594.061 | .660 | .059 |
| Time X Group | 0.79 | 1.171 | 42 | 594.061 | .218 | .076 |
| Time X Gender | 0.879 | 1.974 | 14 | 200 | .021 | .121 |
| Time | 0.488 | 14.964 | 14 | 200 | <.001 | .512 |
| Between-Subjects Tests | |  |  |  |  |  |
| Group X Gender | 0.911 | 0.929 | 21 | 594.942 | .553 | .030 |
| Group | 0.918 | 0.858 | 21 | 594.942 | .647 | .028 |
| Gender | 0.799 | 7.426 | 7 | 207 | <.001 | .201 |
| Note. The dependent variable is the multivariate combination of the Winsorized RMSSD, SDNN, pNN50, HF-FFT, HF-AR, LF/HF-FFT, and LF/HF-AR variables. | | | | | | |
